# Supplementary material for: Combining Recombinase-Mediated Cassette Exchange Strategy with Quantitative Proteomic and Phosphoproteomic Analyses to Inspect Intracellular Functions of the Tumor Suppressor Galectin-4 in Colorectal Cancer Cells
Source: MDPI journal article supplement (doi:10.3390/ijms23126414), 2022-06-08
Supplement: s1 [file s1]

**Figure S1.**

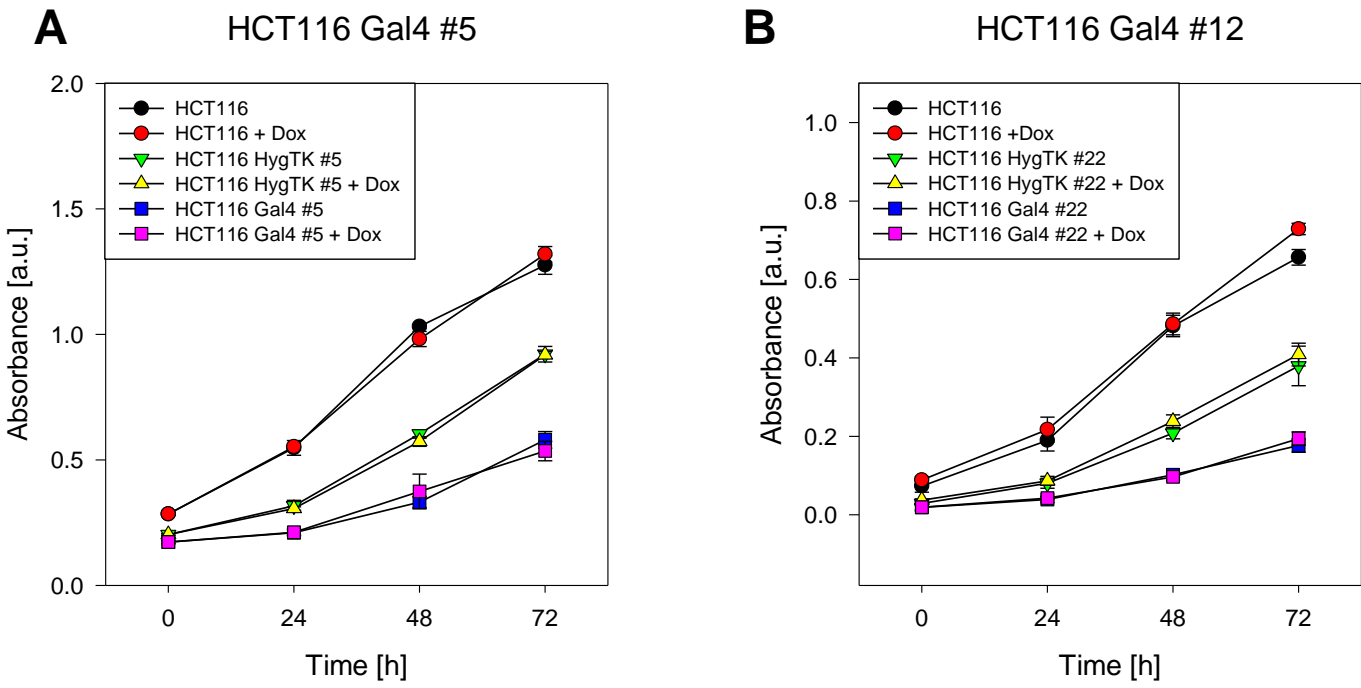

**Figure S1.** Effect of Doxycycline and Gal4 re-expression on cell proliferation. Model cell lines HCT116 Gal4 #5 (A) and #22 (B) as well as HCT116 and master cell lines HCT116 HygTK #5 and #22 were assayed in the presence or absence of doxycycline (0.5  $\mu\text{g}/\text{ml}$  (A) and 0.75  $\mu\text{g}/\text{ml}$  (B)) and data were obtained at the indicated time points. Measured absorbance represent relative cell numbers in the MTS assay. Results are the means of four independent series (+/-S.D.).
