# Supplementary material for: Combining Recombinase-Mediated Cassette Exchange Strategy with Quantitative Proteomic and Phosphoproteomic Analyses to Inspect Intracellular Functions of the Tumor Suppressor Galectin-4 in Colorectal Cancer Cells
Source: MDPI journal article supplement (doi:10.3390/ijms23126414), 2022-06-08
Supplement: s1 [file s1]

Figure S2.

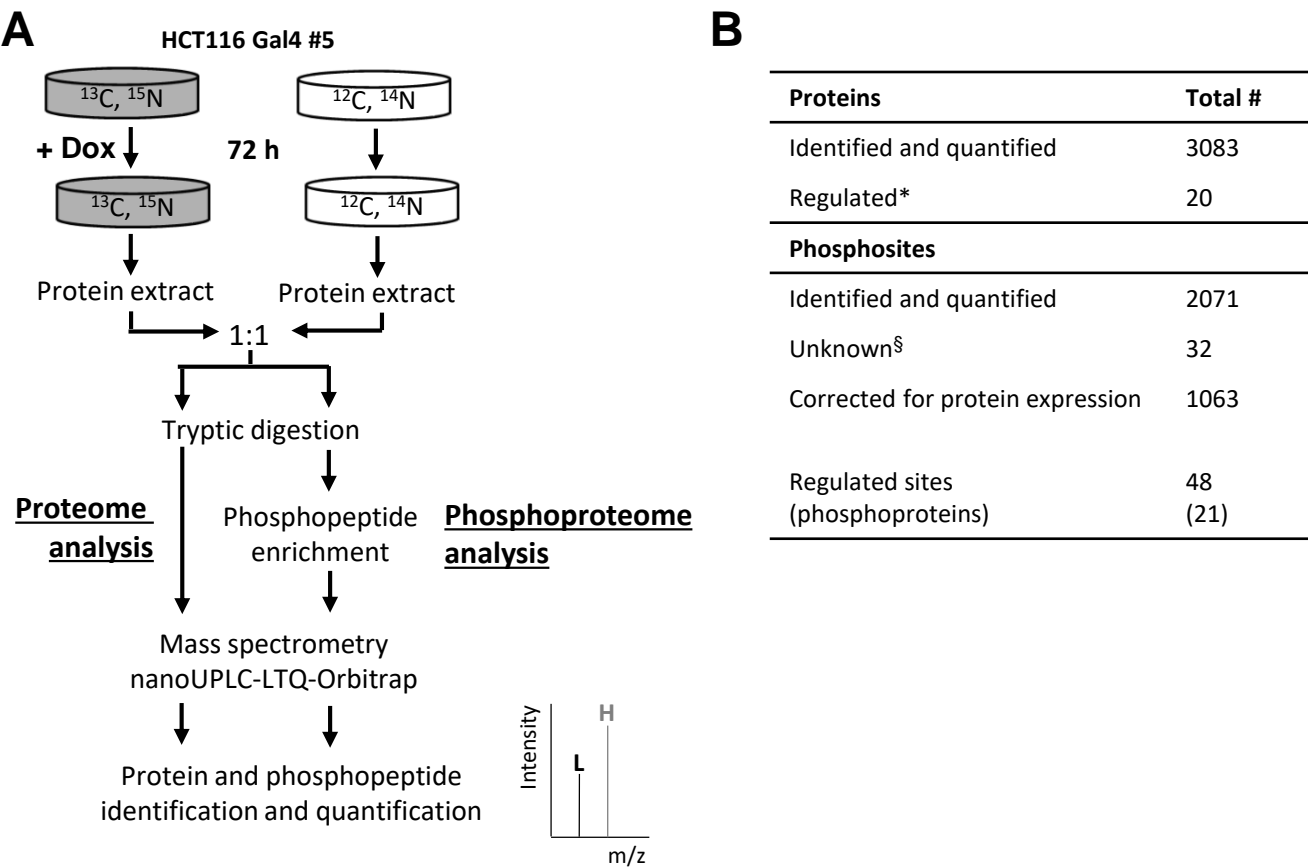

**Figure S2. SILAC-based proteomic and phosphoproteomic analysis:** (A) Workflow: SILAC labeling with Arg-10 and Lys-8 was applied to HCT116 Gal4 #5 cells followed by treatment with doxycycline (0.5  $\mu\text{g}/\text{ml}$ ) and mass spectrometric analysis leading to protein and phosphopeptide identification and quantification. (B) Summary of the proteome and phosphoproteome profiling upon Gal4 expression (\*more than 1.5-fold in at least 2 biological replicates; <sup>§</sup>according to PhosphoSitePlus).
